# Supplementary material for: Paper-based analytical device with colorimetric assay application to the determination of phenolic acids and recognition of Fe3+
Source: Royal Society of Chemistry journal article supplement (doi:10.1039/c4ra14465a), 2014-12-01
Supplement: c4ra14465a1.pdf [file c4ra14465a1.pdf]

## Supplementary Information

### **Paper-based analytical device with colorimetric assay application to the determination of phenolic acids and recognition of Fe<sup>3+</sup>**

Xia Xiang,<sup>a</sup> Zhen Zhang,<sup>b</sup> Jianbin Shi,<sup>c</sup> and Fenghong Huang<sup>\*a</sup>

<sup>a</sup>Department of Product Processing and Nutriology, Institute of OilCrops Research, Chinese Academy of Agricultural Sciences, Hubei Key Laboratory of Lipid Chemistry and Nutrition, Ministry of Agriculture Key Laboratory of Oil Crops Biology, Wuhan 430062, China.

<sup>b</sup>Key Laboratory of Analytical Chemistry for Biology and Medicine (Ministry of Education), College of Chemistry and Molecular Sciences, Wuhan University, Wuhan 430072, China

<sup>c</sup> Institute of Agro-Products Processing and Nuclear-Agricultural Technology, Hubei Academy of Agricultural Sciences, Wuhan, 430064, Hubei Province, China

\* Email: xiangshi19850130@163.com; Phone: +86-27-86711526; Fax: +86-27-68754067.

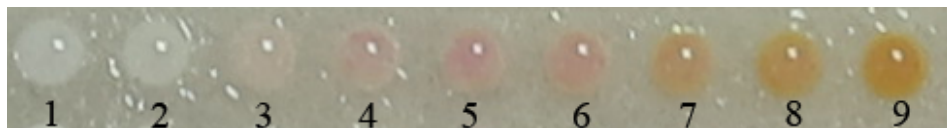

**Fig. S1** Effects of  $\text{Fe}^{3+}$  concentration on the colorimetric response in the presence of SA: 1) blank; 2) 0.35; 3) 3.5; 4) 7; 5) 35; 6) 70; 7) 140; 8) 210; 9) 350 mM. The concentration of SA was 2 mM.

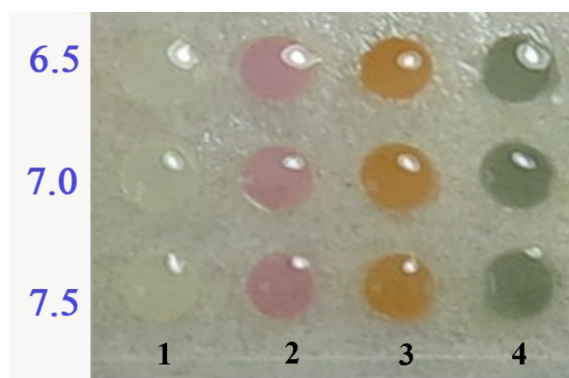

**Fig. S2** Effects of pH value of buffer on the colorimetric response for PAs: 1) blank; 2) SA; 3) SP; 4) CA. The concentration of  $\text{Fe}^{3+}$  was 35 mM. The concentrations of PAs were 2 mM.

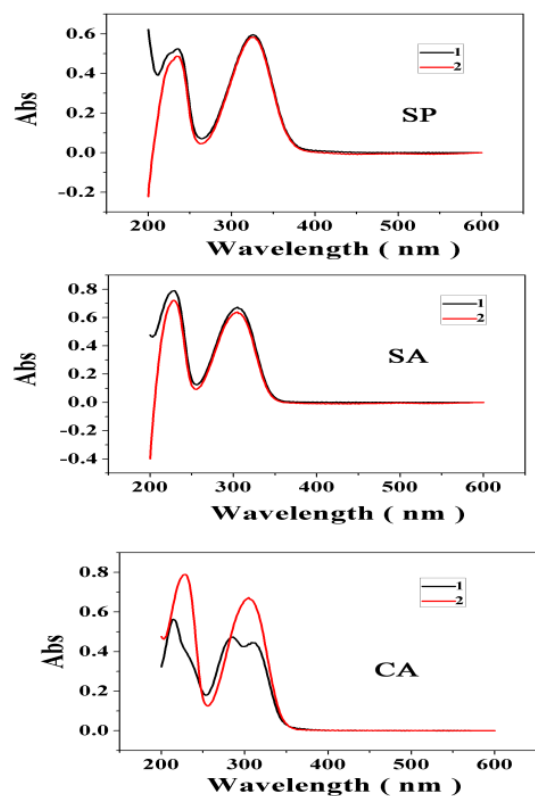

**Fig. S3.** UV-vis absorption spectrum of PAs in the absence (1) and presence of  $\text{Fe}^{2+}$  (2). The concentrations of PAs were 0.267 mM. The concentration of  $\text{Fe}^{2+}$  was 0.25 mM.

**Table S1** Analytical results for the determination of SP and SA in plant extracts

| Sample no | Add (mM) | Found (mM) |      |      | Average (mM) | Average recovery (%) | RSD (%) |
|-----------|----------|------------|------|------|--------------|----------------------|---------|
| SP-1      | 0.20     | 0.21       | 0.22 | 0.19 | 0.21         | 103.3                | 7.39    |
| SP-2      | 0.30     | 0.27       | 0.26 | 0.30 | 0.28         | 92.2                 | 7.51    |
| SP-3      | 0.40     | 0.36       | 0.37 | 0.35 | 0.36         | 90.0                 | 2.78    |
| SA-1      | 0.40     | 0.37       | 0.38 | 0.36 | 0.37         | 92.5                 | 2.70    |
| SA-2      | 0.50     | 0.51       | 0.52 | 0.50 | 0.51         | 102.0                | 1.96    |
| SA-3      | 0.60     | 0.58       | 0.61 | 0.63 | 0.61         | 101.2                | 4.15    |

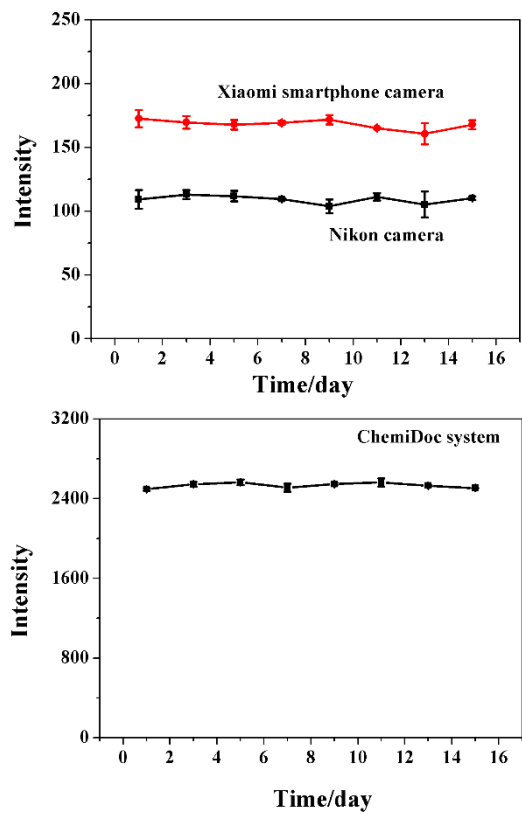

**Fig. S4.** The preservation curves of CA on the PADs based on three different imaging modes.
